# Supplementary material
Source: HighWire-hosted journal article supplement (https://www.jrheum.org/highwire/filestream/40110/field_highwire_adjunct_files/0/201549DataSuppl.pdf)
Supplement: 201549DataSuppl.pdf [file 201549DataSuppl.pdf]

## ONLINE SUPPLEMENTARY MATERIAL

**Supplementary Table 1.** Patient demographics and defining clinical characteristics in men and women with AS or nr-axSpA at enrollment

| Characteristic <sup>a</sup>                    | AS             |                  |                         | nr-axSpA      |                 |                         |
|------------------------------------------------|----------------|------------------|-------------------------|---------------|-----------------|-------------------------|
|                                                | Men<br>(n=252) | Women<br>(n=156) | P<br>value <sup>b</sup> | Men<br>(n=55) | Women<br>(n=35) | P<br>value <sup>c</sup> |
| Age, mean (SD), years                          | 48.1 (14.4)    | 48.5<br>(13.7)   | 0.82 <sup>d</sup>       | 43.6 (10.5)   | 44.4.<br>(12.3) | 0.77 <sup>e</sup>       |
| Race, n (%)                                    |                |                  |                         |               |                 |                         |
| White                                          | 228 (92.3)     | 143 (93.5)       | 0.16 <sup>f</sup>       | 48 (87.3)     | 29 (87.9)       | 0.47 <sup>f</sup>       |
| Black                                          | 3 (1.2)        | 5 (3.3)          |                         | 0             | 1 (3.0)         |                         |
| Other                                          | 16 (6.5)       | 5 (3.3)          |                         | 7 (12.7)      | 3 (9.1)         |                         |
| BMI, mean (SD), kg/m <sup>2</sup>              | 29.9 (5.9)     | 30.3 (9.0)       | 0.32 <sup>d</sup>       | 29.2 (6.2)    | 29.0 (5.8)      | 0.82 <sup>d</sup>       |
| BMI category, n (%)                            |                |                  |                         |               |                 |                         |
| Normal/Underweight (<25<br>kg/m <sup>2</sup> ) | 55 (22.4)      | 48 (31.2)        | 0.15 <sup>g</sup>       | 9 (17.3)      | 12 (34.3)       | 0.07 <sup>g</sup>       |
| Overweight (25 to <30<br>kg/m <sup>2</sup> )   | 77 (31.4)      | 45 (29.2)        |                         | 25 (48.1)     | 9 (25.7)        |                         |
| Obese (≥30 kg/m <sup>2</sup> )                 | 113 (46.1)     | 61 (39.6)        |                         | 18 (34.6)     | 14 (40.0)       |                         |
| Symptom duration, mean (SD),<br>years          | 17.9 (12.4)    | 16.1 (11.8)      | 0.14 <sup>d</sup>       | 16.3 (12.2)   | 13.9 (11.0)     | 0.38 <sup>d</sup>       |
| Disease duration, mean (SD),<br>years          | 10.6 (11.3)    | 8.2 (9.9)        | 0.03 <sup>d</sup>       | 8.8 (8.2)     | 7.9 (10.0)      | 0.34 <sup>d</sup>       |

|                                                        |            |           |                   |            |           |                   |
|--------------------------------------------------------|------------|-----------|-------------------|------------|-----------|-------------------|
| Time from symptom onset to diagnosis, mean (SD), years | 7.2 (8.6)  | 7.9 (9.4) | 0.74 <sup>d</sup> | 7.8 (10.0) | 6.1 (6.7) | 0.99 <sup>d</sup> |
| HLA-B27 positive test result, n (%)                    | 173 (68.7) | 97 (62.2) | 0.18 <sup>g</sup> | 51 (92.7)  | 27 (77.1) | 0.05 <sup>g</sup> |

AS, ankylosing spondylitis; BMI, body mass index; HLA-B27, human leukocyte antigen B27; nr-axSpA, nonradiographic axial spondyloarthritis.

<sup>a</sup> All values were calculated based on available data, and all variables had <20% missing data.

<sup>b</sup> *P* values compare men vs women with AS.

<sup>c</sup> *P* values compare men vs women with nr-axSpA.

<sup>d</sup> *P* value calculated using Wilcoxon rank-sum test.

<sup>e</sup> *P* value calculated using two-sample *t* test.

<sup>f</sup> *P* value calculated using Fisher exact test.

<sup>g</sup> *P* value calculated using  $\chi^2$  test.

**Supplementary Table 2.** Disease activity and clinical features in men and women with AS or nr-axSpA at enrollment

| Characteristic <sup>a</sup>                                            | AS             |                  |                         | nr-axSpA      |                 |                         |
|------------------------------------------------------------------------|----------------|------------------|-------------------------|---------------|-----------------|-------------------------|
|                                                                        | Men<br>(n=252) | Women<br>(n=156) | P<br>value <sup>b</sup> | Men<br>(n=55) | Women<br>(n=35) | P<br>value <sup>c</sup> |
| ASDAS                                                                  | 2.7 (1.2)      | 2.8 (1.0)        | 0.41 <sup>d</sup>       | 2.3 (1.2)     | 3.1 (0.8)       | <0.01 <sup>d</sup>      |
| BASDAI (0-10)                                                          | 4.2 (2.5)      | 4.8 (2.3)        | 0.02 <sup>e</sup>       | 3.9 (2.5)     | 5.4 (2.4)       | <0.01 <sup>d</sup>      |
| BASFI (0-10)                                                           | 3.5 (2.8)      | 4.1 (2.7)        | 0.01 <sup>e</sup>       | 3.0 (2.7)     | 3.8 (2.7)       | 0.12 <sup>e</sup>       |
| Inflammatory back pain,<br>n (%)                                       | 141 (56.0)     | 87 (55.8)        | 0.97 <sup>f</sup>       | 50 (90.9)     | 23 (65.7)       | <0.01 <sup>f</sup>      |
| Lumbar flexion (modified<br>Schober test), cm                          | 4.3 (3.5)      | 4.8 (4.2)        | 0.56 <sup>e</sup>       | 6.0 (7.5)     | 5.1 (3.2)       | 0.68 <sup>e</sup>       |
| Occiput to wall, cm                                                    | 6.3 (7.7)      | 2.7 (5.2)        | <0.01 <sup>e</sup>      | 3.6 (7.5)     | 2.7 (3.9)       | 0.51 <sup>e</sup>       |
| Enthesitis, n (%)                                                      | 45 (17.9)      | 54 (34.6)        | <0.01 <sup>f</sup>      | 17 (30.9)     | 17 (48.6)       | 0.09 <sup>f</sup>       |
| SPARCC Enthesitis Index<br>score in patients with<br>enthesitis (1-16) | 3.3 (2.6)      | 4.2 (3.0)        | 0.16 <sup>e</sup>       | 3.1 (1.8)     | 6.6 (3.3)       | <0.01 <sup>d</sup>      |
| Dactylitis, n (%)                                                      | 9 (3.6)        | 2 (1.3)          | 0.22 <sup>g</sup>       | 0             | 1 (2.9)         | 0.39 <sup>g</sup>       |
| Dactylitis count in patients<br>with dactylitis (1-20)                 | 3.4 (3.5)      | 1.5 (0.7)        | 0.62 <sup>e</sup>       | NA (NA)       | 1.0 (NA)        | NA                      |
| Tender joint count (0-68)                                              | 1.6 (4.5)      | 4.1 (7.9)        | <0.01 <sup>e</sup>      | 2.7 (5.5)     | 9.9 (14.1)      | <0.01 <sup>e</sup>      |
| Swollen joint count (0-66)                                             | 0.7 (2.7)      | 0.7 (1.8)        | 0.17 <sup>e</sup>       | 0.3 (1.0)     | 1.7 (3.1)       | <0.01 <sup>e</sup>      |
| CRP, mg/L                                                              | 12.6 (27.6)    | 8.4 (12.5)       | 0.49 <sup>e</sup>       | 6.0 (6.1)     | 4.8 (3.5)       | 0.95 <sup>e</sup>       |
| ESR, mm/h                                                              | 14.8 (18.4)    | 19.5 (20.4)      | 0.01 <sup>e</sup>       | 6.5 (6.3)     | 12.0 (10.6)     | <0.01 <sup>e</sup>      |

|                                         |             |             |                   |             |             |                   |
|-----------------------------------------|-------------|-------------|-------------------|-------------|-------------|-------------------|
| Physician global assessment (VAS 0-100) | 26.1 (23.4) | 31.7 (22.5) | 0.01 <sup>e</sup> | 23.5 (23.7) | 26.8 (20.7) | 0.28 <sup>e</sup> |
|-----------------------------------------|-------------|-------------|-------------------|-------------|-------------|-------------------|

ASDAS, Ankylosing Spondylitis Disease Activity Score; AS, ankylosing spondylitis; BASDAI, Bath Ankylosing Spondylitis Disease Activity Index; BASFI, Bath Ankylosing Spondylitis Functional Index; CRP, C-reactive protein; ESR, erythrocyte sedimentation rate; NA, not available; nr-axSpA, nonradiographic axial spondyloarthritis; SPARCC, Spondyloarthritis Research Consortium of Canada; VAS, visual analog scale.

<sup>a</sup> Values are mean (SD) unless otherwise indicated. All values were calculated based on available data.

<sup>b</sup> *P* values compare men vs women with AS.

<sup>c</sup> *P* values compare men vs women with nr-axSpA.

<sup>d</sup> *P* value calculated using two-sample *t* test.

<sup>e</sup> *P* value calculated using Wilcoxon rank-sum test.

<sup>f</sup> *P* value calculated using  $\chi^2$  test.

<sup>g</sup> *P* value calculated using Fisher exact test.

**Supplementary Table 3.** Patient-reported outcome measures and work productivity and activity impairment in men and women with AS or nr-axSpA at enrollment

| Characteristic <sup>a</sup>              | AS             |                  |                         | nr-axSpA      |                 |                         |
|------------------------------------------|----------------|------------------|-------------------------|---------------|-----------------|-------------------------|
|                                          | Men<br>(n=252) | Women<br>(n=156) | P<br>value <sup>b</sup> | Men<br>(n=55) | Women<br>(n=35) | P<br>value <sup>c</sup> |
| Patient pain (VAS 0-100)                 | 46.3 (30.5)    | 51.1 (28.3)      | 0.14 <sup>d</sup>       | 40.8 (30.1)   | 53.9 (26.1)     | 0.05 <sup>d</sup>       |
| Patient fatigue (VAS 0-100)              | 45.7 (29.3)    | 52.5 (27.8)      | 0.03 <sup>d</sup>       | 43.8 (28.5)   | 60.4 (24.9)     | <0.01 <sup>d</sup>      |
| Morning stiffness, n (%)                 |                |                  |                         |               |                 |                         |
| <30 minutes                              | 72 (29.5)      | 33 (21.3)        | 0.07 <sup>e</sup>       | 16 (29.1)     | 10 (28.6)       | 0.96 <sup>e</sup>       |
| ≥30 minutes                              | 172 (70.5)     | 122 (78.7)       |                         | 39 (70.9)     | 25 (71.4)       |                         |
| Patient global assessment<br>(VAS 0-100) | 55.7 (32.9)    | 49.6 (31.6)      | 0.54 <sup>d</sup>       | 41.0 (29.1)   | 60.3 (37.3)     | 0.11 <sup>f</sup>       |
| HAQ-DI (0-3)                             | 0.59 (0.63)    | 0.78 (0.65)      | <0.01 <sup>d</sup>      | 0.54 (0.60)   | 0.88 (0.63)     | <0.01 <sup>d</sup>      |
| HAQ-S (0-3)                              | 0.60 (0.63)    | 0.80 (0.65)      | <0.01 <sup>d</sup>      | 0.56 (0.61)   | 0.88 (0.63)     | 0.01 <sup>d</sup>       |
| EQ VAS (0-100) <sup>g</sup>              | 65.8 (22.2)    | 60.7 (22.9)      | 0.02 <sup>d</sup>       | 67.8 (22.4)   | 62.5 (20.2)     | 0.19 <sup>d</sup>       |
| Employment                               |                |                  |                         |               |                 |                         |
| Work status, n (%)                       |                |                  |                         |               |                 |                         |
| Full time                                | 150 (59.8)     | 79 (51.0)        | 0.02 <sup>e</sup>       | 40 (72.7)     | 23 (65.7)       | 0.27 <sup>h</sup>       |
| Part time                                | 9 (3.6)        | 14 (9.0)         |                         | 2 (3.6)       | 6 (17.1)        |                         |
| Disabled                                 | 40 (15.9)      | 20 (12.9)        |                         | 9 (16.4)      | 4 (11.4)        |                         |
| Retired                                  | 36 (14.3)      | 21 (13.5)        |                         | 2 (3.6)       | 1 (2.9)         |                         |
| Other                                    | 16 (6.4)       | 21 (13.5)        |                         | 2 (3.6)       | 1 (2.9)         |                         |
| Current employment, n<br>(%)             | 163 (65.5)     | 94 (60.6)        | 0.33 <sup>e</sup>       | 43 (78.2)     | 27 (79.4)       | 0.89 <sup>e</sup>       |

| WPAI domains               |             |             |                    |             |             |                   |
|----------------------------|-------------|-------------|--------------------|-------------|-------------|-------------------|
| % Work time missed         | 7.7 (20.1)  | 6.0 (14.4)  | 0.73 <sup>d</sup>  | 2.8 (9.1)   | 12.4 (25.5) | 0.16 <sup>d</sup> |
| % Impairment while working | 24.9 (23.5) | 32.9 (27.5) | 0.05 <sup>d</sup>  | 24.9 (25.6) | 44.4 (30.6) | 0.01 <sup>d</sup> |
| % Overall work impairment  | 29.0 (27.2) | 34.6 (27.7) | 0.15 <sup>d</sup>  | 26.1 (27.0) | 43.0 (31.5) | 0.04 <sup>d</sup> |
| % Activity impairment      | 36.2 (29.4) | 45.3 (30.8) | <0.01 <sup>d</sup> | 35.7 (31.3) | 48.3 (26.7) | 0.06 <sup>d</sup> |

AS, ankylosing spondylitis; EQ VAS, EuroQol visual analogue scale; HAQ-DI, Health

Assessment Questionnaire Disability Index; HAQ-S, Health Assessment Questionnaire for the Spondyloarthropathies; nr-axSpA, nonradiographic axial spondyloarthritis; VAS, visual analog scale; WPAI, Work Productivity and Activity Impairment questionnaire.

<sup>a</sup> Values are mean (SD) unless otherwise indicated.

<sup>b</sup> *P* values compare men vs women with AS.

<sup>c</sup> *P* values compare men vs women with nr-axSpA.

<sup>d</sup> *P* value calculated using Wilcoxon rank-sum test.

<sup>e</sup> *P* value calculated using  $\chi^2$  test.

<sup>f</sup> *P* value calculated using two-sample *t* test.

<sup>g</sup> Higher scores indicate better general health.

<sup>h</sup> *P* value calculated using Fisher exact test.

**Supplementary Table 4.** Prior and current treatments in men and women with axSpA at enrollment

| Treatment characteristic <sup>a</sup> | AS             |                  |                         | nr-axSpA      |                 |                         |
|---------------------------------------|----------------|------------------|-------------------------|---------------|-----------------|-------------------------|
|                                       | Men<br>(n=252) | Women<br>(n=156) | P<br>value <sup>b</sup> | Men<br>(n=55) | Women<br>(n=35) | P<br>value <sup>c</sup> |
| Prior medication use                  |                |                  |                         |               |                 |                         |
| Biologic                              | 71 (28.2)      | 50 (32.1)        | 0.41 <sup>d</sup>       | 18 (32.7)     | 13 (37.1)       | 0.67 <sup>d</sup>       |
| No. of prior biologics                |                |                  |                         |               |                 |                         |
| 0                                     | 181 (71.8)     | 106 (67.9)       | 0.46 <sup>d</sup>       | 37 (67.3)     | 22 (62.9)       | 0.47 <sup>e</sup>       |
| 1                                     | 47 (18.7)      | 29 (18.6)        |                         | 10 (18.2)     | 10 (28.6)       |                         |
| ≥2                                    | 24 (9.5)       | 21 (13.5)        |                         | 8 (14.5)      | 3 (8.6)         |                         |
| csDMARD                               | 32 (12.7)      | 32 (20.5)        | 0.04 <sup>d</sup>       | 9 (16.4)      | 10 (28.6)       | 0.17 <sup>d</sup>       |
| No. of prior csDMARDs                 |                |                  |                         |               |                 |                         |
| 0                                     | 220 (87.3)     | 124 (79.5)       | 0.08 <sup>d</sup>       | 46 (83.6)     | 25 (71.4)       | 0.38 <sup>e</sup>       |
| 1                                     | 24 (9.5)       | 21 (13.5)        |                         | 8 (14.5)      | 9 (25.7)        |                         |
| ≥2                                    | 8 (3.2)        | 11 (7.1)         |                         | 1 (1.8)       | 1 (2.9)         |                         |
| Prednisone                            | 20 (7.9)       | 22 (14.1)        | 0.05 <sup>d</sup>       | 7 (12.7)      | 8 (22.9)        | 0.21 <sup>d</sup>       |
| Current medication use                |                |                  |                         |               |                 |                         |
| Biologic                              | 180 (71.4)     | 107 (68.6)       | 0.54 <sup>d</sup>       | 36 (65.5)     | 20 (57.1)       | 0.43 <sup>d</sup>       |
| csDMARD                               | 48 (19.0)      | 34 (21.8)        | 0.50 <sup>d</sup>       | 15 (27.3)     | 13 (37.1)       | 0.32 <sup>d</sup>       |
| Prednisone                            | 8 (3.2)        | 14 (9.0)         | 0.01 <sup>d</sup>       | 1 (1.8)       | 5 (14.3)        | 0.03 <sup>e</sup>       |

AS, ankylosing spondylitis; csDMARD, conventional synthetic disease-modifying antirheumatic drug; nr-axSpA, nonradiographic axial spondyloarthritis.

<sup>a</sup> Values are n (%). All values were calculated based on available data, and all variables had <20% missing data.

<sup>b</sup> *P* values compare men vs women with AS.

<sup>c</sup> *P* values compare men vs women with nr-axSpA.

<sup>d</sup> *P* value calculated using  $\chi^2$  test.

<sup>e</sup> *P* value calculated using Fisher exact test.



**Supplementary Table 5.** Prevalence of select comorbidities in men and women with AS or nr-axSpA at enrollment

| Comorbidity <sup>a</sup>            | AS             |                  |                         | nr-axSpA      |                 |                         |
|-------------------------------------|----------------|------------------|-------------------------|---------------|-----------------|-------------------------|
|                                     | Men<br>(n=252) | Women<br>(n=156) | P<br>value <sup>b</sup> | Men<br>(n=55) | Women<br>(n=35) | P<br>value <sup>c</sup> |
| Hypertension                        | 91 (36.1)      | 42 (26.9)        | 0.05 <sup>d</sup>       | 12 (21.8)     | 13 (37.1)       | 0.11 <sup>d</sup>       |
| Depression                          | 30 (11.9)      | 38 (24.4)        | <0.01 <sup>d</sup>      | 7 (12.7)      | 11 (31.4)       | 0.03 <sup>d</sup>       |
| Hyperlipidemia                      | 45 (17.9)      | 23 (14.7)        | 0.41 <sup>d</sup>       | 3 (5.5)       | 5 (14.3)        | 0.25 <sup>e</sup>       |
| Uveitis                             | 24 (9.5)       | 24 (15.4)        | 0.07 <sup>d</sup>       | 6 (10.9)      | 3 (8.6)         | 1.00 <sup>e</sup>       |
| Cardiovascular disease <sup>f</sup> | 27 (10.7)      | 12 (7.7)         | 0.31 <sup>d</sup>       | 3 (5.5)       | 4 (11.4)        | 0.42 <sup>e</sup>       |
| Diabetes mellitus                   | 17 (6.7)       | 11 (7.1)         | 0.91 <sup>d</sup>       | 4 (7.3)       | 1 (2.9)         | 0.65 <sup>e</sup>       |
| Psoriasis                           | 17 (6.7)       | 5 (3.2)          | 0.12 <sup>d</sup>       | 1 (1.8)       | 5 (14.3)        | 0.03 <sup>e</sup>       |
| Serious infection <sup>g</sup>      | 15 (6.0)       | 9 (5.8)          | 0.94 <sup>d</sup>       | 4 (7.3)       | 1 (2.9)         | 0.65 <sup>e</sup>       |
| Fibromyalgia                        | 2 (0.8)        | 16 (10.3)        | <0.01 <sup>d</sup>      | 1 (1.8)       | 4 (11.4)        | 0.07 <sup>e</sup>       |
| Any cancer (excluding<br>NMSC)      | 12 (4.8)       | 6 (3.8)          | 0.66 <sup>d</sup>       | 1 (1.8)       | 3 (8.6)         | 0.30 <sup>e</sup>       |
| Ulcerative colitis                  | 6 (2.4)        | 12 (7.7)         | 0.01 <sup>d</sup>       | 3 (5.5)       | 1 (2.9)         | 1.00 <sup>#</sup>       |
| Anxiety                             | 7 (2.8)        | 10 (6.4)         | 0.07 <sup>d</sup>       | 0             | 0               | NA                      |

AS, ankylosing spondylitis; NA, not available; NMSC, nonmelanoma skin cancer; nr-axSpA, nonradiographic axial spondyloarthritis.

<sup>a</sup> Values are n (%). All values were calculated based on available data, and all variables had <20% missing data.

<sup>b</sup> P values compare men vs women with AS.

<sup>c</sup> P values compare men vs women with nr-axSpA.

<sup>d</sup> P value calculated using  $\chi^2$  test.

<sup>e</sup> *P* value calculated using Fisher exact test.

<sup>f</sup> Combined histories of myocardial infarction, acute coronary syndrome, coronary artery disease, congestive heart failure, peripheral arterial thromboembolic event, peripheral artery disease, cardiac revascularization procedure, ventricular arrhythmia, cardiac arrest, unstable angina, stroke, transient ischemic attack, peripheral ischemia or gangrene (necrosis), pulmonary embolism, carotid artery disease, or other cardiovascular event.

<sup>g</sup> Includes infections that led to hospitalization or intravenous antibiotics: joint/bursa, cellulitis, sinusitis, diverticulitis, sepsis, pneumonia, bronchitis, gastroenteritis, meningitis, urinary tract infection, upper respiratory tract infection, *Mycobacterium tuberculosis*, or infection of other specified site.
